# Supplementary material
Source: PubMed Central journal article supplement (PMC4973577)
Supplement: NIHMS798568-supplement-Supplemental_Data.pdf [file NIHMS798568-supplement-Supplemental_Data.pdf]

**Supplemental Table 1. Six-month Effect (95% CI) of 4 g/d Lovaza Treatment versus Placebo in Post MI Patients (Excluding 36 Patients with History of Prior MI at Baseline)**

|                                                    | LVESVI                                                      | Non-Infarct<br>Myocardial Fibrosis                         | Infarct Size                               | LVEF                                     |
|----------------------------------------------------|-------------------------------------------------------------|------------------------------------------------------------|--------------------------------------------|------------------------------------------|
| ITT Analysis<br>(GLMM <sup>†</sup> )               | <b>-7.2% (-11.9%, -2.2%)</b><br>P = <b>0.0056</b> , N = 322 | <b>-5.9% (-10.9%, -0.9%)</b><br>P = <b>0.020</b> , N = 322 | -4.6% (-20.0%, 13.7%)<br>P = 0.60, N = 322 | 2.8% (-0.2%, 5.7%)<br>P = 0.073, N = 322 |
| Per Protocol<br>Analysis<br>(t-test <sup>‡</sup> ) | <b>-7.7% (-12.8%, -2.7%)</b><br>P = <b>0.0028</b> , N = 221 | <b>-5.4% (-10.6%, -0.3%)</b><br>P = <b>0.036</b> , N = 152 | -8.2% (-21.4%, 5.0%)<br>P = 0.22, N = 228  | 2.8% (-0.4%, 6.0%)<br>P = 0.083, N = 221 |

ITT was defined as intention-to-treat, LVEF left ventricular ejection fraction, and LVESVI left ventricular end-systolic volume index.

<sup>†</sup> The general linear mixed model (GLMM) produces unbiased estimates for responses with missing data (see statistical analysis). LVESVI and Infarct Size were natural logarithm transformed to reduce skewness and/or heteroscedasticity of residuals. Estimates are relative changes.

<sup>‡</sup> The per protocol analysis only included patients that attended both visits. No transformations were required, instead Satterthwaite approximation was used for heteroscedasticity. Estimates are relative changes.

**Supplemental Table 2. Adjusted Analysis for Six-month Effect (95% CI) of 4 g/d Lovaza**

**Treatment versus Placebo in Post MI Patients by Intention-to-treat Analysis**

|                            | LVESVI <sup>†</sup>                            | Non-Infarct<br>Myocardial Fibrosis             | Infarct Size <sup>‡¶</sup>      | LVEF                          |
|----------------------------|------------------------------------------------|------------------------------------------------|---------------------------------|-------------------------------|
| <b>Model 0*</b>            | <b>-5.8% (-10.3%, -1.1%)</b><br><b>P=0.017</b> | <b>-5.6% (-10.4%, -0.9%)</b><br><b>P=0.022</b> | -3.4% (-17.8%, 13.6%)<br>P=0.68 | 2.4% (-0.4%, 5.2%)<br>P=0.094 |
| <b>Model 1<sup>Φ</sup></b> | <b>-5.4% (-10.1%, -0.6%)</b><br><b>P=0.030</b> | <b>-5.0% (-10.1%, 0.0%)</b><br><b>P=0.046</b>  | 1.9% (-13.2%, 19.7%)<br>P=0.81  | 2.0% (-0.9%, 5.0%)<br>P=0.16  |
| <b>Model 2<sup>§</sup></b> | <b>-5.7% (-10.4%, -0.9%)</b><br><b>P=0.021</b> | -4.7% (-9.7%, 0.3%)<br>P=0.067                 | 2.2% (-13.3%, 20.3%)<br>P=0.80  | 2.2% (-0.7%, 5.2%)<br>P=0.14  |

LVEF left ventricular ejection fraction, and LVESVI left ventricular end-systolic volume index.

\*Model 0 (N=358) demonstrates unadjusted analysis of O-3FA treatment versus placebo for the primary and secondary study endpoints

<sup>Φ</sup>Model 1 (N=354) demonstrates Model 0 adjusted for fixed covariates, including age, gender, race, enrolling site, pre-treatment omega-3 index, and pre-treatment log transformed infarct mass.

<sup>§</sup>Model 2 (N=326) demonstrates Model 1 additionally adjusted for medical therapy (renin-angiotensin system blockade, β-adrenergic–receptor antagonists, dual antiplatelet therapy, hydroxymethylglutaryl–coenzyme A reductase inhibitors), and baseline coronary heart disease risk factors (diabetes mellitus, hypertension, hypercholesterolemia, body mass index, active smoking, and heart rate.)

<sup>¶</sup>Infarct mass (pre-treatment) was not included in these models.

<sup>†</sup>Natural logarithm transformation was used to improve normality and/or homoscedasticity of residuals.
